# Supplementary material for: Microplastics in the Lung Tissues Associated with Blood Test Index
Source: MDPI journal article supplement (doi:10.3390/toxics11090759), 2023-09-06
Supplement: s1 [file s1]

**Title: Microplastics in the lung tissues associated with blood test index**

Shuguang Wang<sup>1,2,#</sup>, Wenfeng Lu<sup>1,2,#</sup>, Qingdong Cao<sup>3,#</sup>, Changli Tu<sup>4</sup>, Chenghui Zhong<sup>2</sup>, Lan Qiu<sup>2</sup>, Saifeng Li<sup>2</sup>, Han Zhang<sup>2</sup>, Meiqi Lan<sup>2</sup>, Liqiu Qiu<sup>2</sup>, Xiaoliang Li<sup>5</sup>, Yuewei Liu<sup>6</sup>, Yun Zhou<sup>1,2,\*</sup>, Jing Liu<sup>4,\*</sup>

**Author Affiliations:**

<sup>1</sup>State Key Laboratory of Respiratory Disease, The First Affiliated Hospital of Guangzhou Medical University, Guangzhou, Guangdong 510120, China

<sup>2</sup>School of Public Health, Guangzhou Medical University, Guangzhou, Guangdong 511436, China

<sup>3</sup>Department of Thoracic Surgery, the Fifth Affiliated Hospital of Sun Yat-sen University, Sun Yat-Sen University, Zhuhai, Guangdong Province 519000, China

<sup>4</sup>Department of Pulmonary and Critical Care Medicine, The Fifth Affiliated Hospital of Sun Yat-sen University, Guangzhou, Guangdong 519000, China

<sup>5</sup>Zhuhai Center for Chronic Disease Control and Prevention, Zhuhai, Guangdong 519060, China

<sup>6</sup>Department of Epidemiology, School of Public Health, Sun Yat-sen University, Guangzhou, Guangdong 510080, China

<sup>#</sup>These authors contribute equally to this work.

**\*Corresponding Authors:**

Jing Liu, PhD, Department of Pulmonary and Critical Care Medicine, The Fifth Affiliated Hospital of Sun Yat-sen University, 52 Meihua East Road, Zhuhai, Guangdong 519000, China; e-mail, [liujing25@sysu.edu.cn](mailto:liujing25@sysu.edu.cn).

Yun Zhou, PhD, State Key Laboratory of Respiratory Disease, The First Affiliated Hospital of Guangzhou Medical University, 151 Yanjiang Road, Guangzhou, Guangdong 510120, China;

School of Public Health, Guangzhou Medical University, 1 Xinzao Road, Guangzhou,  
Guangdong 511436, China; e-mail, [yunz@gzhmu.edu.cn](mailto:yunz@gzhmu.edu.cn).

### **Supplementary Materials**

| <b>Content</b>                                                                             | <b>Page</b> |
|--------------------------------------------------------------------------------------------|-------------|
| <b>Table S1. Characteristics of MPs exposure in the lung tissue and control samples.</b>   | <b>3</b>    |
| <b>Table S2. Information of each patient.</b>                                              | <b>6</b>    |
| <b>Table S3. Correlation coefficients of MPs in the lung tissues and blood test index.</b> | <b>8</b>    |

**Table S1. Characteristics of MPs exposure in the lung tissue and control samples.**

| Sample ID | MPs abundance | Weight of sample (g) | Concentrations (particles/g) <sup>b</sup> | Average Diameter (μm) | Lung tissue portion | 20-100 (μm) |        |                    | 100-500 (μm) |        |                    |
|-----------|---------------|----------------------|-------------------------------------------|-----------------------|---------------------|-------------|--------|--------------------|--------------|--------|--------------------|
|           |               |                      |                                           |                       |                     | Type        | Number | Fiber <sup>c</sup> | Type         | Number | Fiber <sup>c</sup> |
| 1         | 4             | 1.96                 | 2.04                                      | 60.70                 | Right superior lobe | PP          | 2      | 1                  |              |        |                    |
| 2         | 3             | 2.49                 | 1.20                                      | 86.82                 | Left inferior lobe  | PET         | 2      |                    |              |        |                    |
|           |               |                      |                                           |                       |                     | EVA         | 1      |                    |              |        |                    |
| 3         | 32            | 1.82                 | 17.58                                     | 43.88                 | Left superior lobe  | PET         | 1      |                    |              |        |                    |
|           |               |                      |                                           |                       |                     | PP          | 24     | 12                 | PU           | 1      |                    |
|           |               |                      |                                           |                       |                     |             |        |                    | PP           | 2      | 2                  |
|           |               |                      |                                           |                       |                     | BR          | 3      | 1                  |              |        |                    |
| 4         | 4             | 3.79                 | 1.06                                      | 62.69                 | Right inferior lobe | CPE         | 2      |                    |              |        |                    |
|           |               |                      |                                           |                       |                     | ACR         | 1      |                    |              |        |                    |
|           |               |                      |                                           |                       |                     | PET         | 2      |                    |              |        |                    |
|           |               |                      |                                           |                       |                     | PU          | 1      | 1                  |              |        |                    |
| 5         | 15            | 1.93                 | 7.77                                      | 67.79                 | Left superior lobe  |             |        |                    | PVC          | 1      |                    |
|           |               |                      |                                           |                       |                     | PET         | 5      |                    | PET          | 1      |                    |
|           |               |                      |                                           |                       |                     | ACR         | 2      |                    |              |        |                    |
|           |               |                      |                                           |                       |                     | PS          | 2      |                    |              |        |                    |
|           |               |                      |                                           |                       |                     | EVA         | 1      |                    | EVA          | 1      |                    |
|           |               |                      |                                           |                       |                     | PE          | 1      |                    |              |        |                    |
| 6         | 6             | 2.04                 | 2.94                                      | 30.79                 | Right inferior lobe | PVC         | 1      |                    |              |        |                    |
|           |               |                      |                                           |                       |                     |             |        |                    | PP           | 1      |                    |
|           |               |                      |                                           |                       |                     | CPE         | 4      |                    |              |        |                    |
|           |               |                      |                                           |                       |                     | ACR         | 1      |                    |              |        |                    |
|           |               |                      |                                           |                       |                     | PET         | 1      |                    |              |        |                    |

|          |    |      |      |       |                     |      |   |      |   |   |
|----------|----|------|------|-------|---------------------|------|---|------|---|---|
| 7        | 1  | 1.84 | 0.54 | 31.92 | Left inferior lobe  | PVC  | 1 |      |   |   |
| 8        | 3  | 1.99 | 1.51 | 73.83 | Left inferior lobe  | PP   | 1 |      |   |   |
|          |    |      |      |       |                     | PET  | 1 |      |   |   |
| 9        | 0  | 1.89 | 0.00 |       | Left superior lobe  | ACR  | 1 |      |   |   |
| 10       | 4  | 1.71 | 2.34 | 41.18 | Left inferior lobe  | PP   | 2 |      |   |   |
|          |    |      |      |       |                     | PVC  | 1 |      |   |   |
|          |    |      |      |       |                     | SIL  | 1 |      |   |   |
| 11       | 16 | 1.69 | 9.47 | 58.80 | Left superior lobe  | PET  | 7 | PET  | 1 | 1 |
|          |    |      |      |       |                     | PS   | 4 |      |   |   |
|          |    |      |      |       |                     | PP   | 3 |      |   |   |
|          |    |      |      |       |                     | PVC  | 1 |      |   |   |
| 12       | 20 | 3.84 | 5.21 | 65.91 | Right inferior lobe | PTFE | 5 | PTFE | 2 |   |
|          |    |      |      |       |                     | PE   | 4 |      |   |   |
|          |    |      |      |       |                     | PS   | 3 | 1    |   |   |
|          |    |      |      |       |                     | PET  | 2 |      |   |   |
|          |    |      |      |       |                     | PP   | 1 | PP   | 1 |   |
|          |    |      |      |       |                     | PVC  | 1 | PVC  | 1 |   |
| control1 | 0  | 5.00 | 0.00 | -     |                     | -    | - | -    | - |   |
| control2 | 5  | 5.00 | 1.00 | 56.81 |                     | PU   | 3 |      |   |   |
|          |    |      |      |       |                     | PP   | 1 | PP   | 1 |   |
| control3 | 2  | 5.00 | 0.40 | 31.11 |                     | EPN  | 1 |      |   |   |
|          |    |      |      |       |                     | PET  | 1 |      |   |   |

Note: MPs: microplastics, PP: polypropylene, PET: polyethylene terephthalate, PS: polystyrene, PVC: polyvinylchloride, PTFE: polytetrafluoroethylene, CPE: chlorinated polyethylene, PE: polyethylene, ACR: acrylates, EVA: ethylene vinyl acetate, BR: butadiene rubber, PU: polyurethane, SIL: silicone, EPN: phenolic epoxy resin.

<sup>a</sup> MPs with a match degree  $\geq 0.80$  were included.

<sup>b</sup> The concentrations of MPs (particles/g) were calculated by dividing the quantity of MPs by the weight of the relevant lung tissue sample or control sample.

<sup>c</sup> Fibers were defined as MPs with length-to-diameter ratios  $\geq 3$ .

**Table S2. Information of each patient.**

| Sample ID                                                        | 1              | 2                  | 3          | 4              | 5                  | 6                  | 7                  | 8              | 9              | 10                 | 11      | 12             |
|------------------------------------------------------------------|----------------|--------------------|------------|----------------|--------------------|--------------------|--------------------|----------------|----------------|--------------------|---------|----------------|
| <b>Sex</b>                                                       | Female         | Male               | Female     | Male           | Female             | Male               | Male               | Male           | Male           | Male               | Female  | Female         |
| <b>Age, years</b>                                                | 29             | 55                 | 69         | 57             | 49                 | 50                 | 60                 | 67             | 43             | 59                 | 64      | 59             |
| <b>Wearing of face masks, hours per day</b>                      | 2.5            | 9                  | 3.5        | 1              | 2.5                | 12                 | 2                  | 6              | 9              | 2.5                | 5       | 8              |
| <b>Educational level</b>                                         | Junior college | Senior high school | illiteracy | Junior college | Junior high school | Senior high school | Senior high school | Primary school | Junior college | Senior high school | college | Primary school |
| <b>BMI level</b>                                                 | 18.80          | 25.54              | 25.32      | 25.86          | 30.28              | 22.15              | 27.58              | 23.21          | 26.22          | 22.44              | 23.23   | 25.13          |
| <b>Seafood consumption, times per week</b>                       | 4~6            | 1~3                | 1~3        | 4~6            | 1~3                | 1~3                | 7                  | 1~3            | 4~6            | 1~3                | <1      | 7              |
| <b>Traffic pollution exposure time, minutes per day</b>          | 30~60          | 30~60              | <10        | 30~60          | 10~30              | 60~120             | <10                | 10~30          | <10            | <10                | <10     | <10            |
| <b>Distance between residence and nearest major roads, meter</b> | 500~1000       | 300~500            | ≥1000      | ≥1000          | 50~100             | 50~100             | 300~500            | ≥1000          | 300~500        | 100~300            | 50~100  | 100~300        |
| <b>Working indoors</b>                                           | Y              | Y                  | N          | Y              | Y                  | Y                  | Y                  | Y              | Y              | Y                  | Y       | N              |

(Y/N)

|                                                      |   |   |   |   |   |   |   |   |   |   |   |   |
|------------------------------------------------------|---|---|---|---|---|---|---|---|---|---|---|---|
| <b>Alcohol<br/>consumption (Y/N)</b>                 | N | Y | N | N | N | N | N | N | N | N | Y | N |
| <b>Self-cooking (Y/N)</b>                            | Y | Y | Y | N | N | N | N | Y | N | Y | N | Y |
| <b>Hypertension<br/>(Y/N)</b>                        | N | N | Y | N | N | N | Y | N | N | N | N | Y |
| <b>Diabetes (Y/N)</b>                                | N | N | N | N | N | N | N | N | N | N | N | Y |
| <b>Coronary heart<br/>disease (Y/N)</b>              | N | N | N | N | N | N | N | N | N | N | N | N |
| <b>Lung or upper-<br/>airway surgeries<br/>(Y/N)</b> | N | N | N | N | N | N | N | N | N | N | N | N |

---

**Table S3. Correlation coefficients of MPs in the lung tissues and blood test index.**

| <b>Blood test index</b>               | <b>Correlation coefficient</b> | <b><i>p</i> -value<sup>b</sup></b> |
|---------------------------------------|--------------------------------|------------------------------------|
| WBC ( $\times 10^9/L$ )               | 0.32                           | 0.31                               |
| RBC ( $\times 10^9/L$ )               | -0.57                          | 0.06                               |
| HGB (g/L)                             | -0.57                          | 0.05                               |
| PLT ( $\times 10^9/L$ )               | 0.78                           | < 0.01                             |
| Hematocrit (%)                        | -0.57                          | 0.05                               |
| MCV (fL)                              | 0.15                           | 0.64                               |
| Mean red cell hemoglobin content (pg) | -0.25                          | 0.43                               |
| MCHC (g/L)                            | -0.35                          | 0.26                               |
| RDW SD (fL)                           | 0.27                           | 0.39                               |
| RDW CV (%)                            | < 0.01                         | 0.99                               |
| N ( $\times 10^9/L$ )                 | 0.20                           | 0.53                               |
| L ( $\times 10^9/L$ )                 | 0.04                           | 0.90                               |
| N / L                                 | 0.08                           | 0.81                               |
| MON# ( $\times 10^9/L$ )              | -0.03                          | 0.93                               |
| EOS# ( $\times 10^9/L$ )              | 0.36                           | 0.26                               |
| Thrombocytocrit (%)                   | 0.82                           | < 0.01                             |
| PDW (fL)                              | -0.18                          | 0.57                               |
| MPV (fL)                              | -0.20                          | 0.53                               |
| PT (S)                                | 0.01                           | 0.98                               |
| APTT (S)                              | -0.13                          | 0.69                               |
| FIB (g/L)                             | 0.63                           | 0.03                               |
| Urea (mmol/L)                         | -0.41                          | 0.19                               |
| Cr ( $\mu\text{mol/L}$ )              | -0.40                          | 0.19                               |
| UA ( $\mu\text{mol/L}$ )              | -0.38                          | 0.23                               |
| K <sup>+</sup> (mmol/L)               | -0.15                          | 0.64                               |
| Na <sup>+</sup> (mmol/L)              | 0.48                           | 0.11                               |
| Cl <sup>-</sup> (mmol/L)              | 0.14                           | 0.67                               |
| GLU (mmol/L)                          | < 0.01                         | 1.00                               |
| AST (U / L)                           | -0.43                          | 0.17                               |
| ALT (U / L)                           | -0.11                          | 0.73                               |
| TB ( $\mu\text{mol/L}$ )              | -0.66                          | 0.02                               |
| DB ( $\mu\text{mol/L}$ )              | -0.78                          | < 0.01                             |
| Hemobilirubin ( $\mu\text{mol/L}$ )   | -0.62                          | 0.03                               |
| TP (g/L)                              | 0.22                           | 0.48                               |
| Albumin (g/L)                         | -0.06                          | 0.86                               |
| Globulin (g/L)                        | 0.38                           | 0.23                               |

Note: MPs: microplastics, WBC: white blood cell, RBC: red blood cell, HGB: hemoglobin, PLT: platelet, MCV: mean corpuscular volume, MCHC: mean corpuscular-hemoglobin concentration, RDW: red blood cell volume distribution width, N: neutrophil, L: lymphocyte, MON#: monocyte, EOS#: eosinophil, PDW: platelet distribution width, MPV: mean platelet volume, PT: prothrombin time, APTT: activated partial thromboplastin time, FIB: fibrinogen, Cr: Creatinine, UA: blood uric acid, GLU: glucose, AST: aspartate aminotransferase, ALT:

alanine aminotransferase , TB: total bilirubin, DB: direct bilirubin, TP: total protein.

<sup>a</sup> MPs with a match degree  $\geq 0.80$  were included.

<sup>b</sup> The  $p$  -value was estimated using the Mann–Whitney U test.
